# Supplementary figures and images for: Coupling of mitochondrial population evolution to microtubule dynamics in fission yeast cells: a kinetic Monte Carlo study
Source: Royal Society of Chemistry journal article supplement (doi:10.1039/d2sm00155a), 2022-01-01

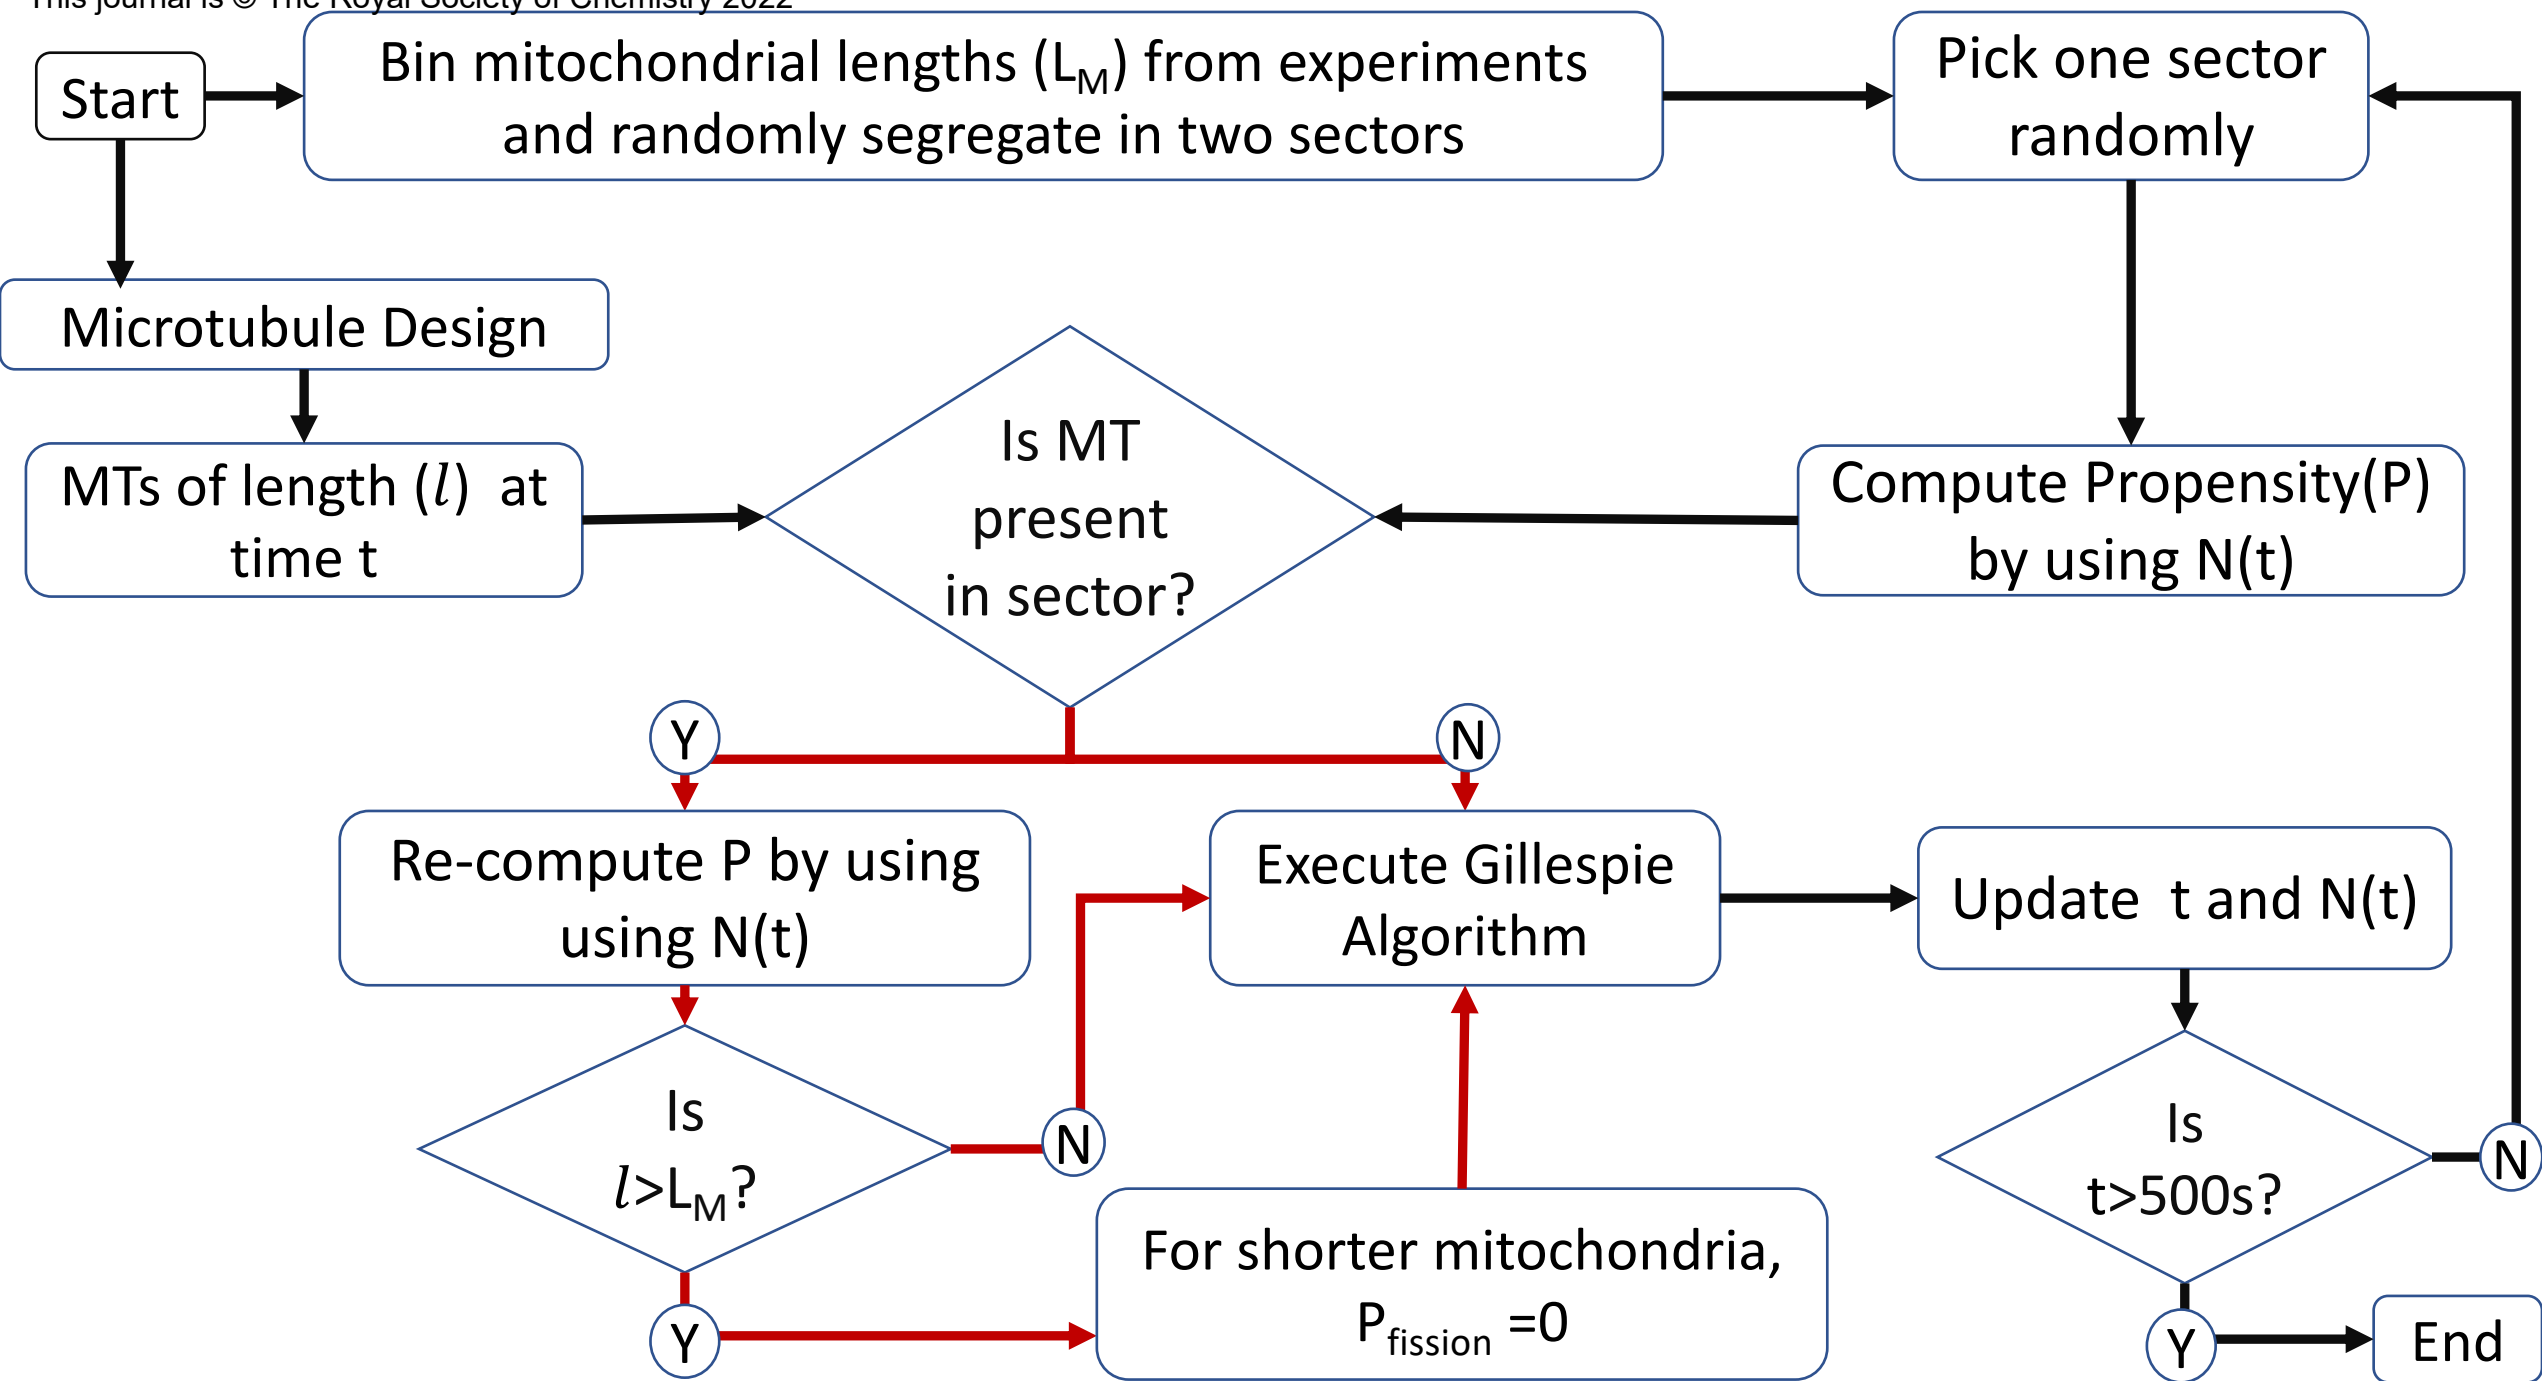

Supplement: d2sm00155a2.pdf [file d2sm00155a2.pdf]

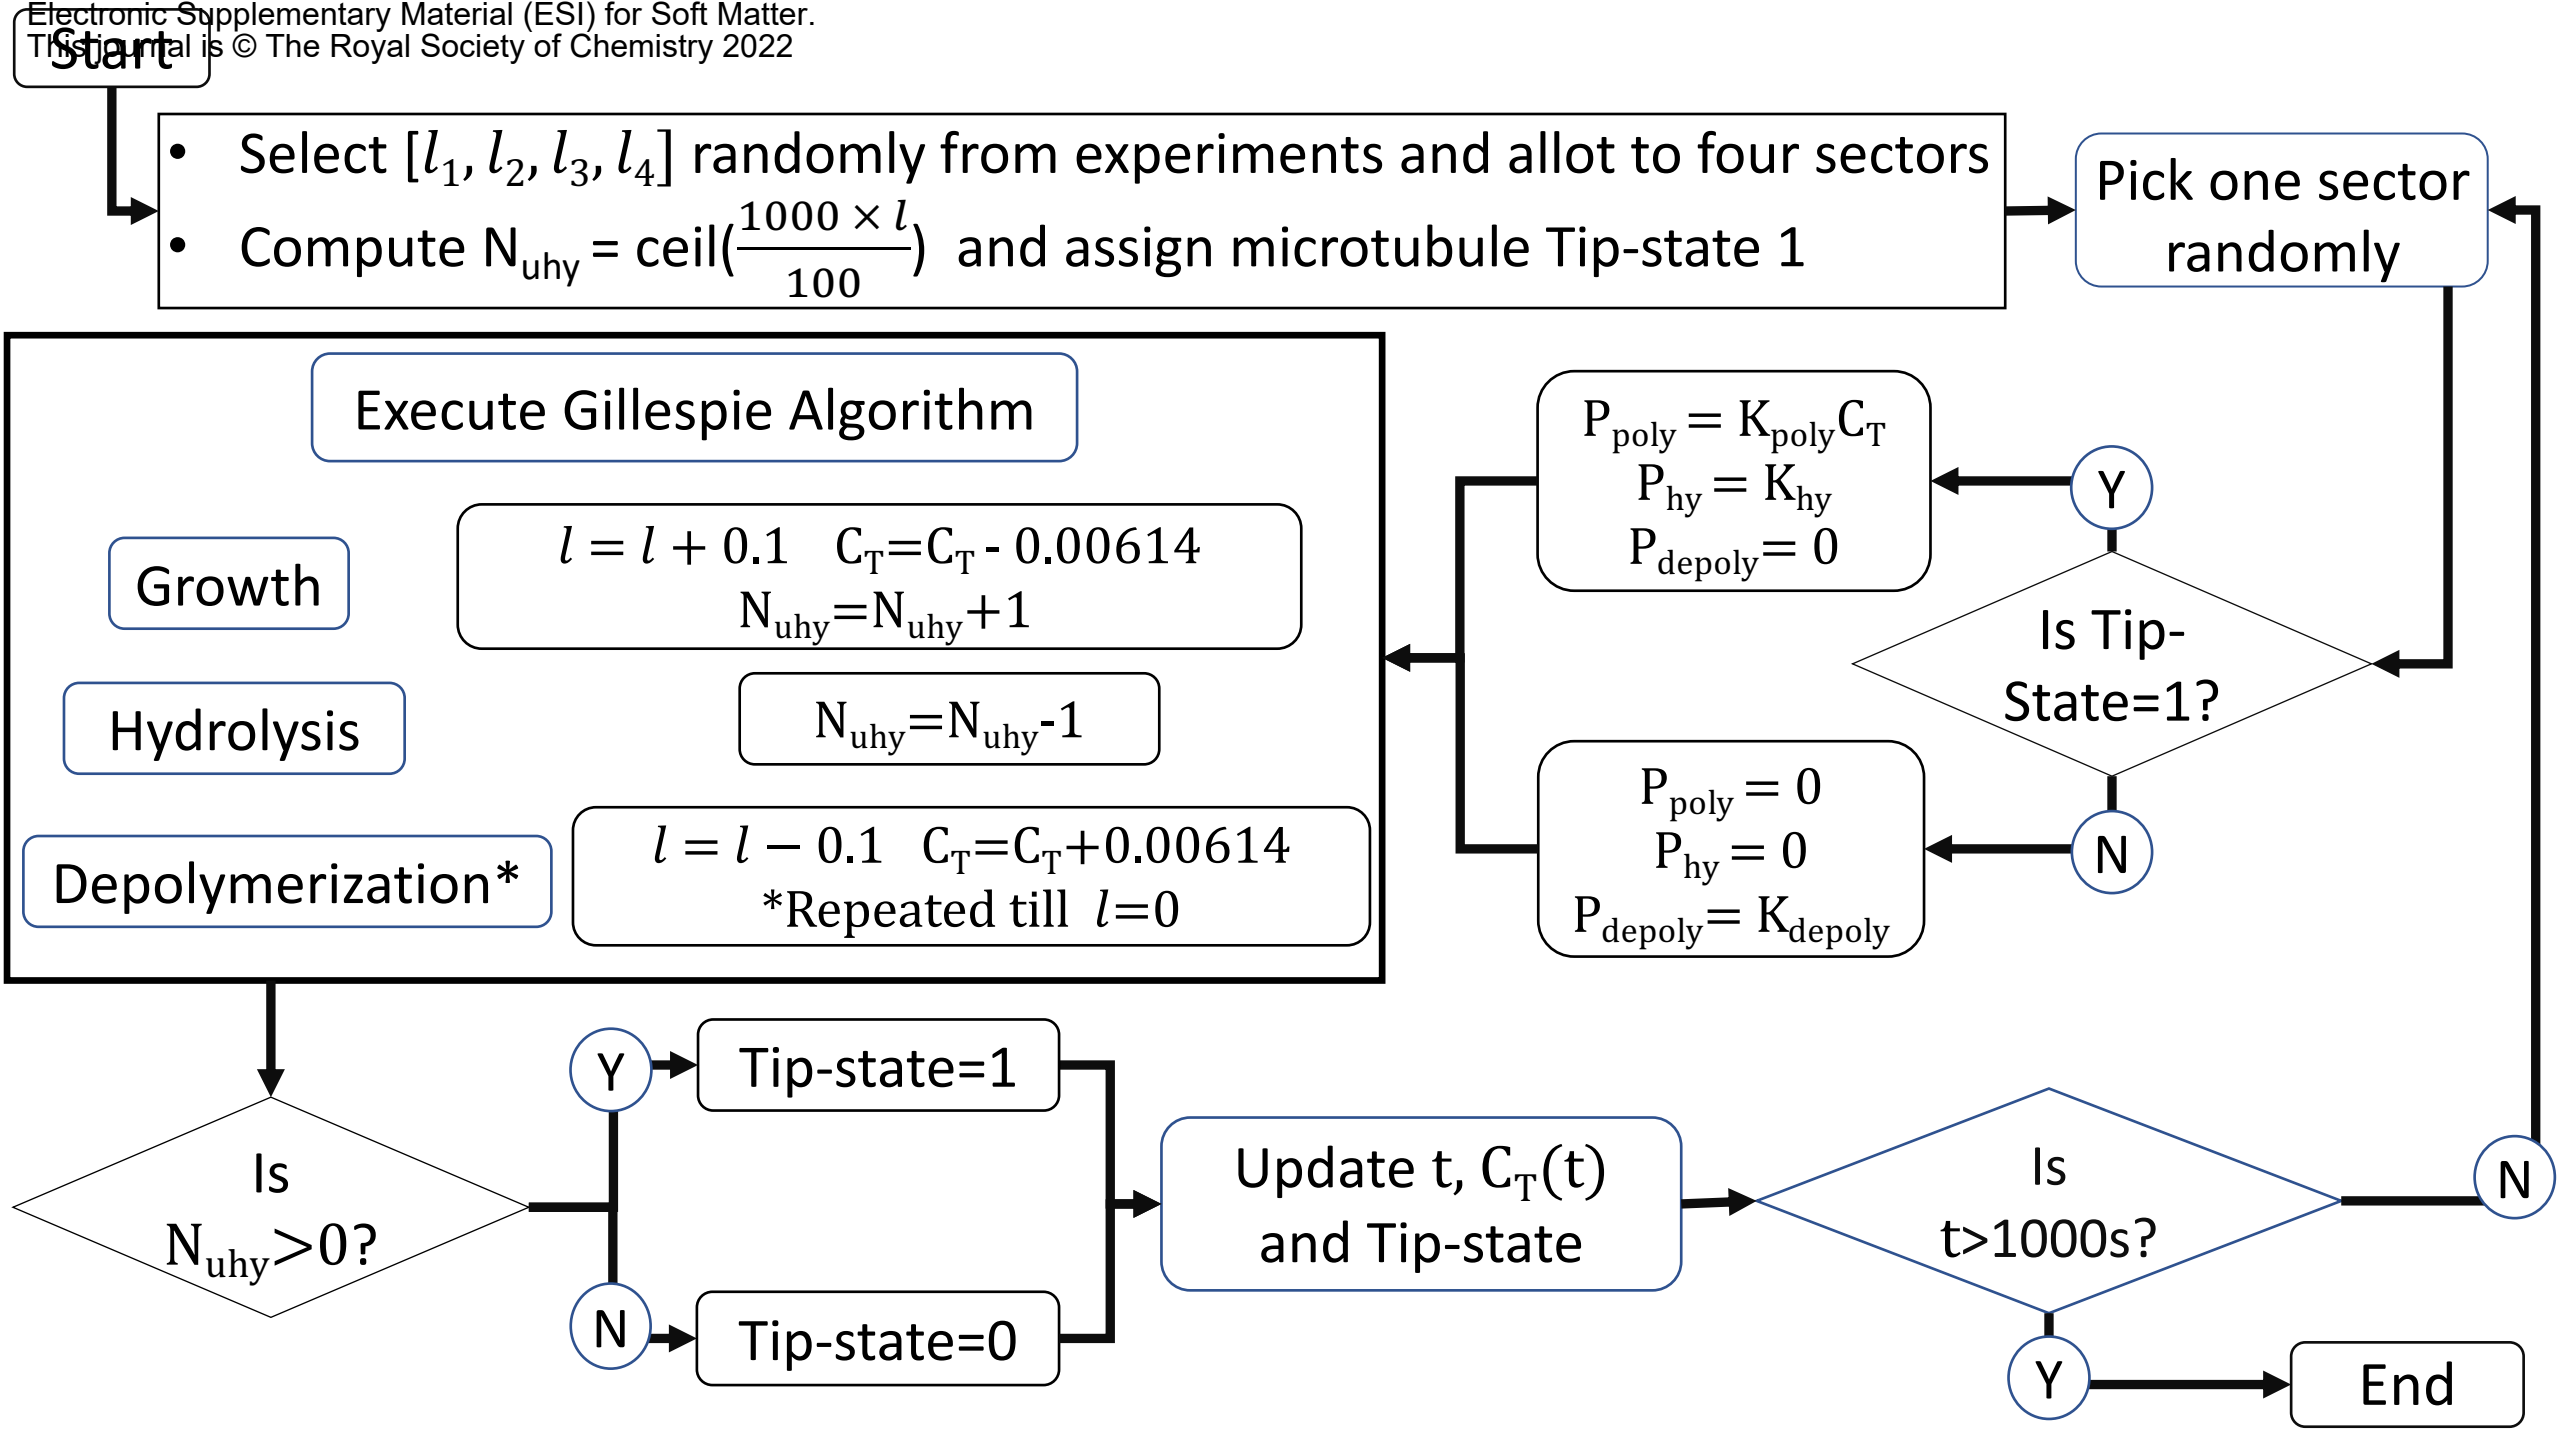

Supplement: d2sm00155a5.pdf [file d2sm00155a5.pdf]
